# Supplementary material for: Sustainable Nanotechnologies for Curative and Preventive Wood Deacidification Treatments: An Eco-Friendly and Innovative Approach
Source: MDPI journal article supplement (doi:10.3390/nano10091744), 2020-09-03
Supplement: s1 [file s1]

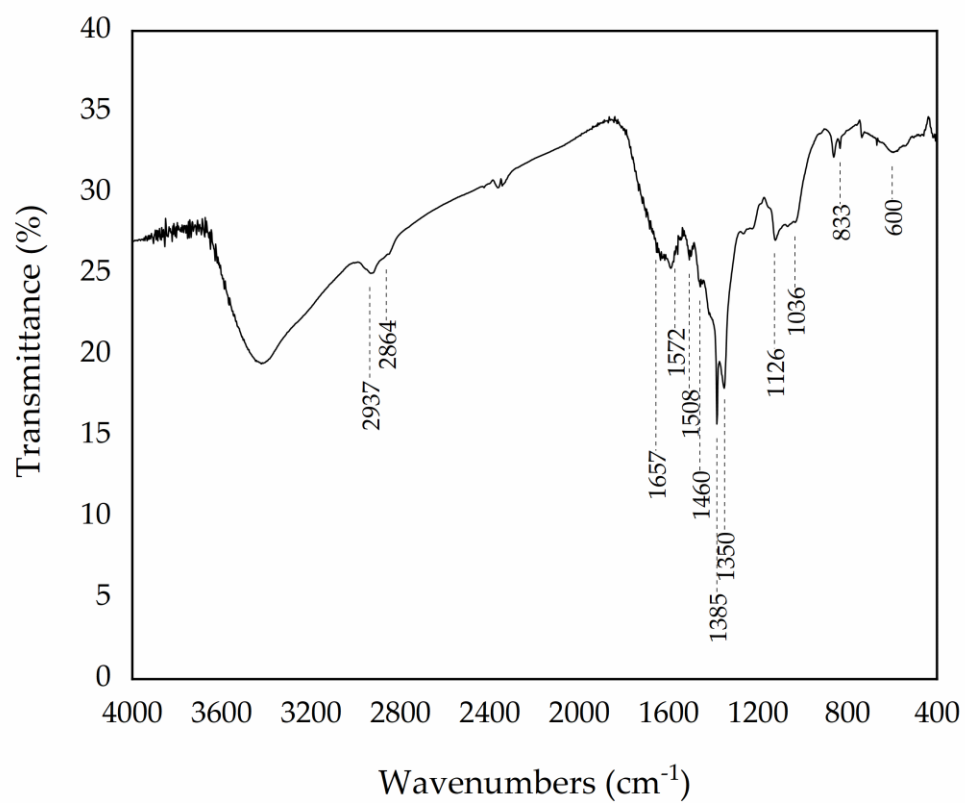

**Figure S1.** FTIR spectrum of the untreated dry fragments of wood samples.

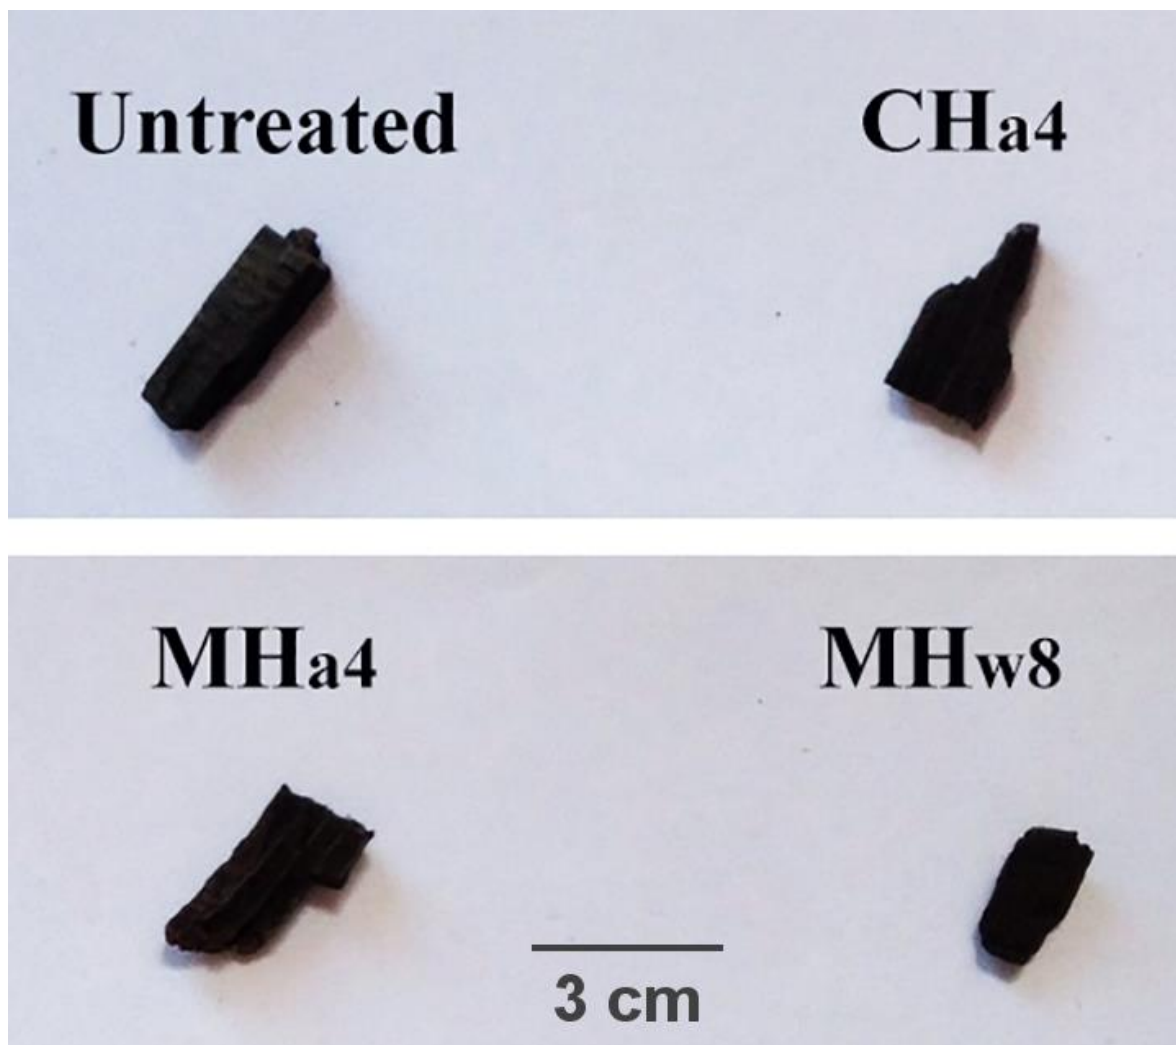

**Figure S2.** Visual inspections of the wood fragments both as received (untreated) and treated by means of CH<sub>a4</sub>, MH<sub>a4</sub> and MH<sub>w8</sub> suspensions.

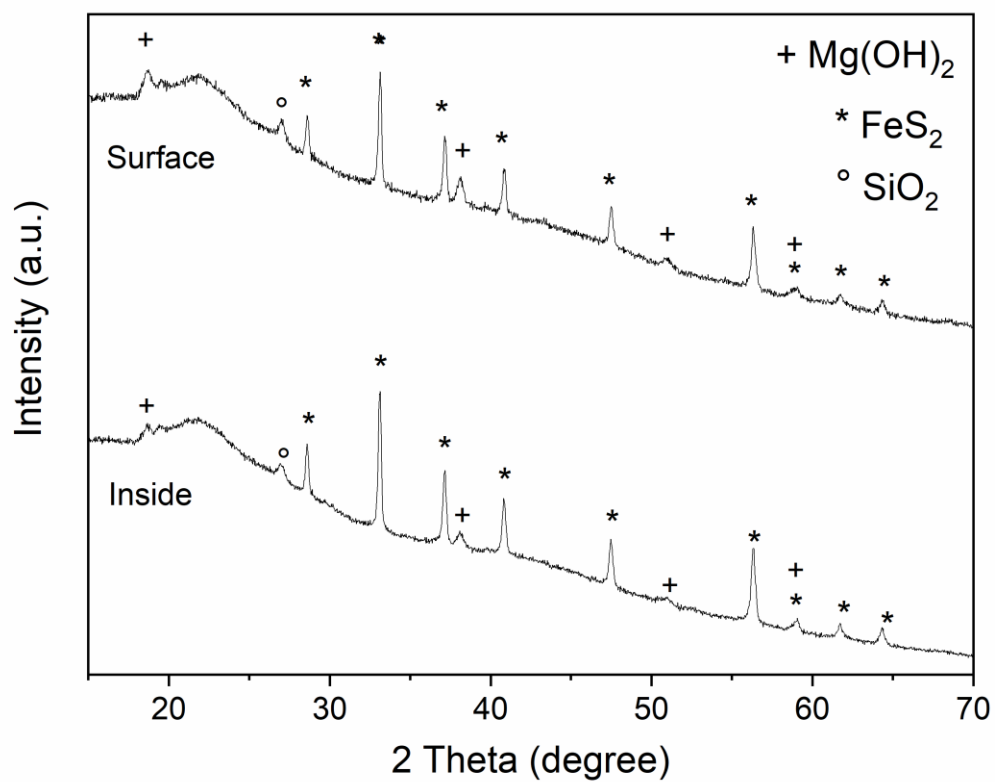

**Figure S3.** XRD patterns referred to the core and to the surface of the wooden samples treated by means of MH NPs.
